# Supplementary material
Source: publisher figshare collection journal article supplement (https://acs.figshare.com/ndownloader/files/4446436)
Supplement: Supplementary file 1 [file 4446436]

data_ce-ade_0m

 

_audit_creation_method            SHELXL-97

_chemical_name_systematic

;

 ?

;

_chemical_name_common             ?

_chemical_melting_point           ?

_chemical_formula_moiety          ?

_chemical_formula_sum

 'C31 H29 Ce N13 O16'

_chemical_formula_weight          979.79

 

loop_

 _atom_type_symbol

 _atom_type_description

 _atom_type_scat_dispersion_real

 _atom_type_scat_dispersion_imag

 _atom_type_scat_source

 'C'  'C'   0.0033   0.0016

 'International Tables Vol C Tables 4.2.6.8 and 6.1.1.4'

 'Ce'  'Ce'  -0.2486   2.6331

 'International Tables Vol C Tables 4.2.6.8 and 6.1.1.4'

 'N'  'N'   0.0061   0.0033

 'International Tables Vol C Tables 4.2.6.8 and 6.1.1.4'

 'O'  'O'   0.0106   0.0060

 'International Tables Vol C Tables 4.2.6.8 and 6.1.1.4'

 'H'  'H'   0.0000   0.0000

 'International Tables Vol C Tables 4.2.6.8 and 6.1.1.4'

 

_symmetry_cell_setting            Triclinic

_symmetry_space_group_name_H-M    P-1

 

loop_

 _symmetry_equiv_pos_as_xyz

 'x, y, z'

 '-x, -y, -z'

 

_cell_length_a                    11.7732(6)

_cell_length_b                    12.3819(6)

_cell_length_c                    13.3803(7)

_cell_angle_alpha                 107.692(2)

_cell_angle_beta                  90.626(3)

_cell_angle_gamma                 97.040(3)

_cell_volume                      1841.85(16)

_cell_formula_units_Z             2

_cell_measurement_temperature     296(2)

_cell_measurement_reflns_used     9892

_cell_measurement_theta_min       2.31

_cell_measurement_theta_max       27.58

 

_exptl_crystal_description        'blocks'

_exptl_crystal_colour             'yellow'

_exptl_crystal_size_max           0.34

_exptl_crystal_size_mid           0.22

_exptl_crystal_size_min           0.14

_exptl_crystal_density_meas       ?

_exptl_crystal_density_diffrn     1.767

_exptl_crystal_density_method     'not measured'

_exptl_crystal_F_000              984

_exptl_absorpt_coefficient_mu     1.330

_exptl_absorpt_correction_type    none

_exptl_absorpt_correction_T_min   ?

_exptl_absorpt_correction_T_max   ?

_exptl_absorpt_process_details    ?

 

_exptl_special_details

;

 ?

;

 

_diffrn_ambient_temperature       296(2)

_diffrn_radiation_wavelength      0.71073

_diffrn_radiation_type            MoK\a

_diffrn_radiation_source          'fine-focus sealed tube'

_diffrn_radiation_monochromator   graphite

_diffrn_measurement_device_type   'CCD area detector'

_diffrn_measurement_method        'phi and omega scans'

_diffrn_detector_area_resol_mean  ?

_diffrn_standards_number          ?

_diffrn_standards_interval_count  ?

_diffrn_standards_interval_time   ?

_diffrn_standards_decay_%         ?

_diffrn_reflns_number             27168

_diffrn_reflns_av_R_equivalents   0.0684

_diffrn_reflns_av_sigmaI/netI     0.0577

_diffrn_reflns_limit_h_min        -15

_diffrn_reflns_limit_h_max        15

_diffrn_reflns_limit_k_min        -16

_diffrn_reflns_limit_k_max        16

_diffrn_reflns_limit_l_min        -17

_diffrn_reflns_limit_l_max        17

_diffrn_reflns_theta_min          1.60

_diffrn_reflns_theta_max          28.39

_reflns_number_total              8823

_reflns_number_gt                 7804

_reflns_threshold_expression      >2sigma(I)

 

_computing_data_collection        'Bruker SMART'

_computing_cell_refinement        'Bruker SMART'

_computing_data_reduction         'Bruker SAINT'

_computing_structure_solution     'SHELXS-97 (Sheldrick, 1990)'

_computing_structure_refinement   'SHELXL-97 (Sheldrick, 1997)'

_computing_molecular_graphics     'Bruker SHELXTL'

_computing_publication_material   'Bruker SHELXTL'

 

_refine_special_details

;

 Refinement of F^2^ against ALL reflections.  The weighted R-factor wR and

 goodness of fit S are based on F^2^, conventional R-factors R are based

 on F, with F set to zero for negative F^2^. The threshold expression of

 F^2^ > 2sigma(F^2^) is used only for calculating R-factors(gt) etc. and is

 not relevant to the choice of reflections for refinement.  R-factors based

 on F^2^ are statistically about twice as large as those based on F, and R-

 factors based on ALL data will be even larger.

;

 

_refine_ls_structure_factor_coef  Fsqd

_refine_ls_matrix_type            full

_refine_ls_weighting_scheme       calc

_refine_ls_weighting_details

 'calc w=1/[\s^2^(Fo^2^)+(0.0000P)^2^+90.8689P] where P=(Fo^2^+2Fc^2^)/3'

_atom_sites_solution_primary      direct

_atom_sites_solution_secondary    difmap

_atom_sites_solution_hydrogens    geom

_refine_ls_hydrogen_treatment     constr

_refine_ls_extinction_method      none

_refine_ls_extinction_coef        ?

_refine_ls_number_reflns          8823

_refine_ls_number_parameters      563

_refine_ls_number_restraints      0

_refine_ls_R_factor_all           0.0926

_refine_ls_R_factor_gt            0.0658

_refine_ls_wR_factor_ref          0.2472

_refine_ls_wR_factor_gt           0.2344

_refine_ls_goodness_of_fit_ref    1.020

_refine_ls_restrained_S_all       1.020

_refine_ls_shift/su_max           0.001

_refine_ls_shift/su_mean          0.000

 

loop_

 _atom_site_label

 _atom_site_type_symbol

 _atom_site_fract_x

 _atom_site_fract_y

 _atom_site_fract_z

 _atom_site_U_iso_or_equiv

 _atom_site_adp_type

 _atom_site_occupancy

 _atom_site_symmetry_multiplicity

 _atom_site_calc_flag

 _atom_site_refinement_flags

 _atom_site_disorder_assembly

 _atom_site_disorder_group

C1 C 0.0665(11) 0.2129(11) 0.5603(11) 0.038(3) Uani 1 1 d . . .

C2 C 0.0032(11) 0.3137(11) 0.5758(10) 0.036(3) Uani 1 1 d . . .

C3 C -0.0981(12) 0.3159(12) 0.5229(11) 0.046(3) Uani 1 1 d . . .

H3 H -0.1336 0.2502 0.4729 0.055 Uiso 1 1 calc R . .

C4 C -0.1452(13) 0.4155(13) 0.5450(12) 0.051(4) Uani 1 1 d . . .

H4 H -0.2151 0.4171 0.5127 0.062 Uiso 1 1 calc R . .

C5 C -0.0875(11) 0.5160(12) 0.6170(12) 0.041(3) Uani 1 1 d . . .

H5 H -0.1157 0.5856 0.6296 0.050 Uiso 1 1 calc R . .

C6 C 0.0114(10) 0.5083(10) 0.6680(10) 0.034(3) Uani 1 1 d . . .

C7 C 0.0843(11) 0.6079(11) 0.7476(12) 0.041(3) Uani 1 1 d . . .

C8 C 0.4345(11) 0.5789(12) 0.9106(12) 0.043(3) Uani 1 1 d . . .

C9 C 0.3494(11) 0.5584(12) 0.9896(10) 0.040(3) Uani 1 1 d . . .

C10 C 0.3659(16) 0.6086(17) 1.0976(12) 0.065(5) Uani 1 1 d . . .

H10 H 0.4322 0.6575 1.1270 0.078 Uiso 1 1 calc R . .

C11 C 0.2811(17) 0.5833(18) 1.1594(13) 0.072(6) Uani 1 1 d . . .

H11 H 0.2871 0.6188 1.2316 0.087 Uiso 1 1 calc R . .

C12 C 0.1863(15) 0.5048(16) 1.1139(14) 0.061(4) Uani 1 1 d . . .

H12 H 0.1306 0.4834 1.1555 0.073 Uiso 1 1 calc R . .

C13 C 0.1756(12) 0.4580(12) 1.0037(11) 0.042(3) Uani 1 1 d . . .

C14 C 0.0761(11) 0.3754(14) 0.9434(12) 0.045(3) Uani 1 1 d . . .

C15 C 0.3599(11) 0.4234(11) 0.5316(10) 0.037(3) Uani 1 1 d . . .

C16 C 0.4278(11) 0.3379(11) 0.5560(10) 0.033(2) Uani 1 1 d . . .

C17 C 0.5164(12) 0.2869(13) 0.4966(11) 0.045(3) Uani 1 1 d . . .

H17 H 0.5393 0.3074 0.4378 0.054 Uiso 1 1 calc R . .

C18 C 0.5676(14) 0.2090(14) 0.5249(13) 0.053(4) Uani 1 1 d . . .

H18 H 0.6273 0.1766 0.4870 0.063 Uiso 1 1 calc R . .

C19 C 0.5307(12) 0.1770(13) 0.6115(13) 0.047(3) Uani 1 1 d . . .

H19 H 0.5641 0.1219 0.6314 0.056 Uiso 1 1 calc R . .

C20 C 0.4432(10) 0.2289(10) 0.6675(10) 0.032(2) Uani 1 1 d . . .

C21 C 0.3949(11) 0.2068(11) 0.7635(11) 0.036(3) Uani 1 1 d . . .

C22 C 0.2618(11) 0.2493(11) 0.2027(10) 0.035(3) Uani 1 1 d . . .

C23 C 0.2348(11) 0.1909(11) 0.0967(11) 0.038(3) Uani 1 1 d . . .

C24 C 0.2124(14) 0.1134(14) -0.0707(13) 0.057(4) Uani 1 1 d . . .

H24 H 0.2261 0.0947 -0.1419 0.068 Uiso 1 1 calc R . .

C25 C 0.1364(10) 0.1135(11) 0.0716(11) 0.036(3) Uani 1 1 d . . .

C26 C 0.1010(12) 0.1492(11) 0.2465(10) 0.037(3) Uani 1 1 d . . .

H26 H 0.0544 0.1360 0.2984 0.045 Uiso 1 1 calc R . .

C27 C 0.2096(13) 0.8600(13) 0.1467(14) 0.051(4) Uani 1 1 d . . .

C28 C 0.3055(12) 0.9398(11) 0.1749(12) 0.042(3) Uani 1 1 d . . .

C29 C 0.4440(13) 1.0705(13) 0.2466(12) 0.047(3) Uani 1 1 d . . .

H29 H 0.4931 1.1258 0.2965 0.057 Uiso 1 1 calc R . .

C30 C 0.3753(11) 0.9565(12) 0.0926(12) 0.041(3) Uani 1 1 d . . .

C31 C 0.2624(16) 0.8253(16) -0.0307(14) 0.066(5) Uani 1 1 d . . .

H31 H 0.2423 0.7837 -0.1004 0.079 Uiso 1 1 calc R . .

Ce1 Ce 0.23707(5) 0.40166(6) 0.74612(5) 0.02598(18) Uani 1 1 d . . .

N1 N 0.0557(8) 0.4095(9) 0.6488(8) 0.032(2) Uani 1 1 d . . .

N2 N 0.2579(8) 0.4850(9) 0.9451(8) 0.031(2) Uani 1 1 d . . .

N3 N 0.3946(8) 0.3087(8) 0.6402(8) 0.029(2) Uani 1 1 d . . .

N4 N 0.1932(9) 0.2241(9) 0.2769(9) 0.037(2) Uani 1 1 d . . .

N5 N 0.0682(9) 0.0897(9) 0.1455(9) 0.037(2) Uani 1 1 d . . .

H5N H 0.0079 0.0399 0.1292 0.045 Uiso 1 1 calc R . .

N6 N 0.1222(10) 0.0655(11) -0.0339(10) 0.047(3) Uani 1 1 d . . .

N7 N 0.2809(12) 0.1900(12) 0.0026(10) 0.055(3) Uani 1 1 d . . .

H7N H 0.3420 0.2310 -0.0066 0.066 Uiso 1 1 calc R . .

N8 N 0.3547(11) 0.3278(10) 0.2367(10) 0.050(3) Uani 1 1 d . . .

H8A H 0.3693 0.3603 0.3030 0.060 Uiso 1 1 calc R . .

H8B H 0.3995 0.3456 0.1923 0.060 Uiso 1 1 calc R . .

N9 N 0.1935(11) 0.8052(12) 0.0405(11) 0.056(3) Uani 1 1 d . . .

H9N H 0.1345 0.7544 0.0191 0.067 Uiso 1 1 calc R . .

N10 N 0.3584(11) 0.8999(12) -0.0122(10) 0.052(3) Uani 1 1 d . . .

N11 N 0.4597(10) 1.0402(10) 0.1425(9) 0.041(3) Uani 1 1 d . . .

H11N H 0.5145 1.0694 0.1128 0.049 Uiso 1 1 calc R . .

N12 N 0.3502(11) 1.0126(10) 0.2704(10) 0.045(3) Uani 1 1 d . . .

N13 N 0.1364(12) 0.8345(12) 0.2137(13) 0.069(4) Uani 1 1 d . . .

H13A H 0.1477 0.8690 0.2800 0.082 Uiso 1 1 calc R . .

H13B H 0.0778 0.7835 0.1909 0.082 Uiso 1 1 calc R . .

O1 O 0.1511(8) 0.2270(8) 0.6254(8) 0.047(2) Uani 1 1 d . . .

O2 O 0.0353(9) 0.1240(8) 0.4878(8) 0.049(3) Uani 1 1 d . . .

O3 O 0.1698(7) 0.5792(7) 0.7915(7) 0.037(2) Uani 1 1 d . . .

O4 O 0.1219(16) 0.7396(16) 0.7495(11) 0.012(5) Uiso 0.48(5) 1 d P . .

O5 O 0.4082(7) 0.5258(8) 0.8176(7) 0.039(2) Uani 1 1 d . . .

O6 O 0.5219(10) 0.6486(12) 0.9444(10) 0.072(4) Uani 1 1 d . . .

O7 O 0.0806(8) 0.3441(8) 0.8450(8) 0.046(2) Uani 1 1 d . . .

O8 O -0.0006(11) 0.3473(13) 0.9967(12) 0.083(4) Uani 1 1 d . . .

O9 O 0.2885(8) 0.4622(9) 0.6035(7) 0.043(2) Uani 1 1 d . . .

O10 O 0.3754(9) 0.4526(9) 0.4527(8) 0.049(2) Uani 1 1 d . . .

O11 O 0.3142(7) 0.2680(8) 0.8044(7) 0.0353(19) Uani 1 1 d . . .

O12 O 0.4325(10) 0.1377(11) 0.8008(10) 0.055(5) Uani 0.91(4) 1 d P . .

O13 O 0.065(2) 0.7039(12) 0.7603(15) 0.072(8) Uani 0.86(6) 1 d P . .

O14 O 0.3494(11) 0.0864(11) 0.7462(10) 0.018(4) Uiso 0.52(3) 1 d P . .

O15 O 0.1983(13) 0.9648(12) 0.4230(12) 0.079(4) Uani 1 1 d . . .

O16 O 0.1244(17) 0.0118(14) 0.6779(13) 0.115(7) Uani 1 1 d . . .

O17 O 0.273(2) 0.850(2) 0.7067(16) 0.160(10) Uani 1 1 d . . .

O18 O 0.577(5) 0.250(3) 0.262(2) 0.35(3) Uani 1 1 d . . .

 

loop_

 _atom_site_aniso_label

 _atom_site_aniso_U_11

 _atom_site_aniso_U_22

 _atom_site_aniso_U_33

 _atom_site_aniso_U_23

 _atom_site_aniso_U_13

 _atom_site_aniso_U_12

C1 0.033(6) 0.033(6) 0.041(7) 0.002(5) -0.004(5) 0.003(5)

C2 0.035(6) 0.032(6) 0.037(7) 0.005(5) -0.005(5) 0.004(5)

C3 0.041(7) 0.041(7) 0.045(8) -0.001(6) -0.015(6) 0.005(6)

C4 0.042(8) 0.050(9) 0.056(9) 0.006(7) -0.024(7) 0.011(6)

C5 0.034(6) 0.039(7) 0.055(8) 0.015(6) -0.002(6) 0.014(5)

C6 0.032(6) 0.030(6) 0.039(7) 0.010(5) -0.003(5) 0.006(5)

C7 0.037(7) 0.028(6) 0.056(8) 0.007(6) -0.007(6) 0.004(5)

C8 0.027(6) 0.045(8) 0.051(8) 0.011(6) -0.001(6) -0.003(5)

C9 0.033(6) 0.049(8) 0.032(6) 0.003(6) -0.012(5) 0.007(6)

C10 0.060(10) 0.087(13) 0.033(8) 0.006(8) -0.007(7) -0.013(9)

C11 0.077(13) 0.092(14) 0.035(8) 0.013(9) 0.003(8) -0.017(11)

C12 0.058(10) 0.073(11) 0.056(10) 0.026(9) 0.029(8) 0.007(8)

C13 0.038(7) 0.044(8) 0.045(8) 0.015(6) 0.013(6) 0.009(6)

C14 0.029(6) 0.057(9) 0.047(8) 0.016(7) 0.007(6) -0.002(6)

C15 0.041(7) 0.036(7) 0.037(7) 0.016(5) -0.008(5) 0.006(5)

C16 0.035(6) 0.032(6) 0.033(6) 0.011(5) 0.002(5) 0.004(5)

C17 0.046(8) 0.051(8) 0.037(7) 0.011(6) 0.012(6) 0.010(6)

C18 0.052(9) 0.055(9) 0.059(10) 0.024(8) 0.028(7) 0.017(7)

C19 0.039(7) 0.049(8) 0.064(9) 0.029(7) 0.018(7) 0.018(6)

C20 0.026(5) 0.030(6) 0.040(7) 0.009(5) 0.002(5) 0.004(5)

C21 0.031(6) 0.035(6) 0.043(7) 0.014(5) 0.003(5) 0.003(5)

C22 0.036(6) 0.032(6) 0.036(6) 0.008(5) -0.001(5) 0.008(5)

C23 0.032(6) 0.031(6) 0.046(7) 0.011(5) -0.001(5) -0.009(5)

C24 0.055(9) 0.060(10) 0.046(8) 0.013(7) 0.010(7) -0.021(8)

C25 0.028(6) 0.028(6) 0.051(8) 0.013(5) 0.005(5) -0.006(5)

C26 0.045(7) 0.031(6) 0.036(7) 0.011(5) 0.012(5) 0.004(5)

C27 0.039(7) 0.038(8) 0.072(11) 0.013(7) 0.004(7) 0.001(6)

C28 0.041(7) 0.033(7) 0.048(8) 0.004(6) -0.002(6) 0.007(6)

C29 0.049(8) 0.043(8) 0.052(9) 0.017(7) 0.001(7) 0.006(6)

C30 0.033(6) 0.035(7) 0.054(8) 0.014(6) -0.003(6) -0.001(5)

C31 0.066(11) 0.063(11) 0.053(10) 0.008(8) -0.023(9) -0.018(9)

Ce1 0.0209(3) 0.0277(3) 0.0273(3) 0.0059(2) -0.0012(2) 0.0025(2)

N1 0.028(5) 0.032(5) 0.031(5) 0.004(4) -0.006(4) 0.006(4)

N2 0.027(5) 0.036(5) 0.029(5) 0.008(4) 0.005(4) 0.004(4)

N3 0.028(5) 0.027(5) 0.032(5) 0.007(4) 0.002(4) 0.003(4)

N4 0.036(5) 0.038(6) 0.037(6) 0.010(5) 0.004(4) 0.006(5)

N5 0.032(5) 0.035(6) 0.045(6) 0.012(5) 0.006(5) -0.001(4)

N6 0.043(6) 0.055(7) 0.043(7) 0.020(6) 0.006(5) -0.011(6)

N7 0.052(7) 0.065(9) 0.043(7) 0.017(6) 0.012(6) -0.012(6)

N8 0.052(7) 0.043(7) 0.041(6) 0.004(5) -0.009(5) -0.015(6)

N9 0.044(7) 0.049(8) 0.064(9) 0.011(7) -0.015(6) -0.012(6)

N10 0.052(7) 0.059(8) 0.043(7) 0.014(6) 0.001(6) -0.002(6)

N11 0.036(6) 0.036(6) 0.049(7) 0.012(5) -0.004(5) -0.001(5)

N12 0.049(7) 0.038(6) 0.043(6) 0.003(5) 0.003(5) 0.006(5)

N13 0.059(9) 0.051(8) 0.087(11) 0.014(8) 0.032(8) -0.011(7)

O1 0.041(5) 0.032(5) 0.058(6) -0.001(4) -0.020(5) 0.010(4)

O2 0.052(6) 0.039(5) 0.046(6) -0.003(4) -0.014(5) 0.001(4)

O3 0.031(4) 0.031(4) 0.043(5) 0.003(4) -0.009(4) 0.004(3)

O5 0.032(4) 0.040(5) 0.035(5) 0.003(4) 0.000(4) -0.011(4)

O6 0.044(6) 0.083(9) 0.068(8) 0.011(7) -0.012(6) -0.037(6)

O7 0.029(4) 0.042(5) 0.057(6) 0.005(5) -0.001(4) -0.006(4)

O8 0.049(7) 0.099(11) 0.090(10) 0.023(8) 0.028(7) -0.017(7)

O9 0.050(5) 0.052(6) 0.040(5) 0.026(4) 0.012(4) 0.021(5)

O10 0.054(6) 0.060(7) 0.039(5) 0.026(5) 0.005(5) 0.005(5)

O11 0.038(5) 0.040(5) 0.032(4) 0.016(4) 0.010(4) 0.008(4)

O12 0.049(7) 0.069(9) 0.072(9) 0.049(7) 0.021(6) 0.030(6)

O13 0.069(15) 0.016(6) 0.114(13) -0.007(7) -0.054(10) 0.012(7)

O15 0.086(10) 0.066(8) 0.083(10) 0.020(7) 0.024(8) 0.016(7)

O16 0.160(17) 0.088(11) 0.088(11) 0.043(9) -0.053(11) -0.061(11)

O17 0.19(2) 0.17(2) 0.104(15) 0.055(15) -0.029(15) -0.080(18)

O18 0.72(9) 0.27(4) 0.14(2) 0.10(3) 0.19(4) 0.34(5)

 

_geom_special_details

;

 All esds (except the esd in the dihedral angle between two l.s. planes)

 are estimated using the full covariance matrix.  The cell esds are taken

 into account individually in the estimation of esds in distances, angles

 and torsion angles; correlations between esds in cell parameters are only

 used when they are defined by crystal symmetry.  An approximate (isotropic)

 treatment of cell esds is used for estimating esds involving l.s. planes.

;

 

loop_

 _geom_bond_atom_site_label_1

 _geom_bond_atom_site_label_2

 _geom_bond_distance

 _geom_bond_site_symmetry_2

 _geom_bond_publ_flag

C1 O2 1.237(15) . ?

C1 O1 1.276(15) . ?

C1 C2 1.493(18) . ?

C2 N1 1.359(15) . ?

C2 C3 1.387(17) . ?

C3 C4 1.37(2) . ?

C3 H3 0.9300 . ?

C4 C5 1.41(2) . ?

C4 H4 0.9300 . ?

C5 C6 1.371(17) . ?

C5 H5 0.9300 . ?

C6 N1 1.343(15) . ?

C6 C7 1.521(17) . ?

C7 O13 1.199(17) . ?

C7 O3 1.299(15) . ?

C7 O4 1.63(2) . ?

C8 O5 1.233(16) . ?

C8 O6 1.243(16) . ?

C8 C9 1.52(2) . ?

C9 N2 1.326(16) . ?

C9 C10 1.390(19) . ?

C10 C11 1.37(2) . ?

C10 H10 0.9300 . ?

C11 C12 1.39(2) . ?

C11 H11 0.9300 . ?

C12 C13 1.41(2) . ?

C12 H12 0.9300 . ?

C13 N2 1.327(16) . ?

C13 C14 1.50(2) . ?

C14 O8 1.237(17) . ?

C14 O7 1.258(17) . ?

C15 O10 1.224(15) . ?

C15 O9 1.303(16) . ?

C15 C16 1.509(17) . ?

C16 N3 1.332(15) . ?

C16 C17 1.413(18) . ?

C17 C18 1.34(2) . ?

C17 H17 0.9300 . ?

C18 C19 1.39(2) . ?

C18 H18 0.9300 . ?

C19 C20 1.387(17) . ?

C19 H19 0.9300 . ?

C20 N3 1.338(15) . ?

C20 C21 1.497(18) . ?

C21 O12 1.235(16) . ?

C21 O11 1.308(15) . ?

C21 O14 1.468(18) . ?

C22 N8 1.345(17) . ?

C22 N4 1.371(16) . ?

C22 C23 1.396(18) . ?

C23 N7 1.373(18) . ?

C23 C25 1.377(16) . ?

C24 N7 1.32(2) . ?

C24 N6 1.324(17) . ?

C24 H24 0.9300 . ?

C25 N6 1.354(18) . ?

C25 N5 1.359(16) . ?

C26 N4 1.310(17) . ?

C26 N5 1.353(17) . ?

C26 H26 0.9300 . ?

C27 N13 1.33(2) . ?

C27 C28 1.37(2) . ?

C27 N9 1.38(2) . ?

C28 N12 1.375(18) . ?

C28 C30 1.43(2) . ?

C29 N12 1.337(19) . ?

C29 N11 1.350(19) . ?

C29 H29 0.9300 . ?

C30 N11 1.348(17) . ?

C30 N10 1.363(19) . ?

C31 N9 1.32(2) . ?

C31 N10 1.34(2) . ?

C31 H31 0.9300 . ?

Ce1 O11 2.305(9) . ?

Ce1 O9 2.314(9) . ?

Ce1 O3 2.335(8) . ?

Ce1 O1 2.370(9) . ?

Ce1 O5 2.375(8) . ?

Ce1 O7 2.441(10) . ?

Ce1 N1 2.516(9) . ?

Ce1 N3 2.523(10) . ?

Ce1 N2 2.543(10) . ?

N5 H5N 0.8600 . ?

N7 H7N 0.8600 . ?

N8 H8A 0.8600 . ?

N8 H8B 0.8600 . ?

N9 H9N 0.8600 . ?

N11 H11N 0.8600 . ?

N13 H13A 0.8600 . ?

N13 H13B 0.8600 . ?

O4 O13 0.80(2) . ?

O12 O14 1.201(18) . ?

 

loop_

 _geom_angle_atom_site_label_1

 _geom_angle_atom_site_label_2

 _geom_angle_atom_site_label_3

 _geom_angle

 _geom_angle_site_symmetry_1

 _geom_angle_site_symmetry_3

 _geom_angle_publ_flag

O2 C1 O1 124.9(12) . . ?

O2 C1 C2 119.7(12) . . ?

O1 C1 C2 115.4(11) . . ?

N1 C2 C3 120.6(12) . . ?

N1 C2 C1 113.2(10) . . ?

C3 C2 C1 126.2(12) . . ?

C4 C3 C2 119.4(12) . . ?

C4 C3 H3 120.3 . . ?

C2 C3 H3 120.3 . . ?

C3 C4 C5 119.7(12) . . ?

C3 C4 H4 120.2 . . ?

C5 C4 H4 120.2 . . ?

C6 C5 C4 118.2(12) . . ?

C6 C5 H5 120.9 . . ?

C4 C5 H5 120.9 . . ?

N1 C6 C5 121.9(12) . . ?

N1 C6 C7 113.0(10) . . ?

C5 C6 C7 125.1(11) . . ?

O13 C7 O3 125.5(14) . . ?

O13 C7 C6 120.0(13) . . ?

O3 C7 C6 114.3(11) . . ?

O13 C7 O4 27.8(13) . . ?

O3 C7 O4 106.3(11) . . ?

C6 C7 O4 131.3(12) . . ?

O5 C8 O6 126.1(14) . . ?

O5 C8 C9 116.1(11) . . ?

O6 C8 C9 117.8(13) . . ?

N2 C9 C10 122.9(14) . . ?

N2 C9 C8 113.0(11) . . ?

C10 C9 C8 124.1(13) . . ?

C11 C10 C9 117.7(16) . . ?

C11 C10 H10 121.1 . . ?

C9 C10 H10 121.1 . . ?

C10 C11 C12 119.8(16) . . ?

C10 C11 H11 120.1 . . ?

C12 C11 H11 120.1 . . ?

C11 C12 C13 118.9(14) . . ?

C11 C12 H12 120.5 . . ?

C13 C12 H12 120.5 . . ?

N2 C13 C12 120.2(13) . . ?

N2 C13 C14 114.9(12) . . ?

C12 C13 C14 124.9(13) . . ?

O8 C14 O7 128.1(14) . . ?

O8 C14 C13 115.9(14) . . ?

O7 C14 C13 116.0(12) . . ?

O10 C15 O9 125.7(12) . . ?

O10 C15 C16 121.4(13) . . ?

O9 C15 C16 112.9(11) . . ?

N3 C16 C17 120.2(12) . . ?

N3 C16 C15 113.9(11) . . ?

C17 C16 C15 125.9(12) . . ?

C18 C17 C16 120.0(13) . . ?

C18 C17 H17 120.0 . . ?

C16 C17 H17 120.0 . . ?

C17 C18 C19 119.4(13) . . ?

C17 C18 H18 120.3 . . ?

C19 C18 H18 120.3 . . ?

C20 C19 C18 118.7(13) . . ?

C20 C19 H19 120.6 . . ?

C18 C19 H19 120.6 . . ?

N3 C20 C19 121.4(12) . . ?

N3 C20 C21 112.8(10) . . ?

C19 C20 C21 125.8(12) . . ?

O12 C21 O11 124.1(13) . . ?

O12 C21 O14 51.9(9) . . ?

O11 C21 O14 107.3(11) . . ?

O12 C21 C20 121.0(12) . . ?

O11 C21 C20 114.9(11) . . ?

O14 C21 C20 113.1(11) . . ?

N8 C22 N4 117.6(12) . . ?

N8 C22 C23 123.0(12) . . ?

N4 C22 C23 119.3(12) . . ?

N7 C23 C25 105.8(12) . . ?

N7 C23 C22 136.5(12) . . ?

C25 C23 C22 117.6(13) . . ?

N7 C24 N6 114.0(14) . . ?

N7 C24 H24 123.0 . . ?

N6 C24 H24 123.0 . . ?

N6 C25 N5 127.1(11) . . ?

N6 C25 C23 110.2(12) . . ?

N5 C25 C23 122.7(13) . . ?

N4 C26 N5 125.1(12) . . ?

N4 C26 H26 117.4 . . ?

N5 C26 H26 117.4 . . ?

N13 C27 C28 124.7(16) . . ?

N13 C27 N9 120.9(14) . . ?

C28 C27 N9 114.4(14) . . ?

C27 C28 N12 132.4(15) . . ?

C27 C28 C30 117.5(14) . . ?

N12 C28 C30 110.1(12) . . ?

N12 C29 N11 112.7(14) . . ?

N12 C29 H29 123.6 . . ?

N11 C29 H29 123.6 . . ?

N11 C30 N10 128.6(14) . . ?

N11 C30 C28 104.3(12) . . ?

N10 C30 C28 127.0(12) . . ?

N9 C31 N10 126.2(16) . . ?

N9 C31 H31 116.9 . . ?

N10 C31 H31 116.9 . . ?

O11 Ce1 O9 127.7(3) . . ?

O11 Ce1 O3 146.8(3) . . ?

O9 Ce1 O3 79.0(3) . . ?

O11 Ce1 O1 77.7(3) . . ?

O9 Ce1 O1 87.9(4) . . ?

O3 Ce1 O1 127.9(3) . . ?

O11 Ce1 O5 86.2(3) . . ?

O9 Ce1 O5 80.0(3) . . ?

O3 Ce1 O5 79.2(3) . . ?

O1 Ce1 O5 147.6(3) . . ?

O11 Ce1 O7 78.9(3) . . ?

O9 Ce1 O7 146.6(3) . . ?

O3 Ce1 O7 86.0(3) . . ?

O1 Ce1 O7 78.1(4) . . ?

O5 Ce1 O7 126.4(3) . . ?

O11 Ce1 N1 136.5(3) . . ?

O9 Ce1 N1 72.3(3) . . ?

O3 Ce1 N1 64.3(3) . . ?

O1 Ce1 N1 63.7(3) . . ?

O5 Ce1 N1 137.3(3) . . ?

O7 Ce1 N1 74.3(3) . . ?

O11 Ce1 N3 64.0(3) . . ?

O9 Ce1 N3 63.7(3) . . ?

O3 Ce1 N3 137.4(3) . . ?

O1 Ce1 N3 72.8(3) . . ?

O5 Ce1 N3 75.0(3) . . ?

O7 Ce1 N3 136.5(3) . . ?

N1 Ce1 N3 117.9(3) . . ?

O11 Ce1 N2 74.2(3) . . ?

O9 Ce1 N2 136.6(4) . . ?

O3 Ce1 N2 72.6(3) . . ?

O1 Ce1 N2 135.5(4) . . ?

O5 Ce1 N2 63.2(3) . . ?

O7 Ce1 N2 63.2(3) . . ?

N1 Ce1 N2 120.3(3) . . ?

N3 Ce1 N2 121.8(3) . . ?

C6 N1 C2 120.0(10) . . ?

C6 N1 Ce1 120.2(8) . . ?

C2 N1 Ce1 119.8(8) . . ?

C9 N2 C13 120.3(12) . . ?

C9 N2 Ce1 119.6(8) . . ?

C13 N2 Ce1 120.0(9) . . ?

C16 N3 C20 120.2(10) . . ?

C16 N3 Ce1 119.8(8) . . ?

C20 N3 Ce1 120.0(8) . . ?

C26 N4 C22 119.3(11) . . ?

C26 N5 C25 115.9(11) . . ?

C26 N5 H5N 122.0 . . ?

C25 N5 H5N 122.0 . . ?

C24 N6 C25 104.1(12) . . ?

C24 N7 C23 105.9(12) . . ?

C24 N7 H7N 127.0 . . ?

C23 N7 H7N 127.0 . . ?

C22 N8 H8A 120.0 . . ?

C22 N8 H8B 120.0 . . ?

H8A N8 H8B 120.0 . . ?

C31 N9 C27 124.5(13) . . ?

C31 N9 H9N 117.8 . . ?

C27 N9 H9N 117.8 . . ?

C31 N10 C30 110.4(14) . . ?

C30 N11 C29 108.7(13) . . ?

C30 N11 H11N 125.6 . . ?

C29 N11 H11N 125.6 . . ?

C29 N12 C28 104.1(13) . . ?

C27 N13 H13A 120.0 . . ?

C27 N13 H13B 120.0 . . ?

H13A N13 H13B 120.0 . . ?

C1 O1 Ce1 127.1(8) . . ?

C7 O3 Ce1 127.7(8) . . ?

O13 O4 C7 44.6(15) . . ?

C8 O5 Ce1 127.9(8) . . ?

C14 O7 Ce1 126.0(8) . . ?

C15 O9 Ce1 129.2(8) . . ?

C21 O11 Ce1 128.3(8) . . ?

O14 O12 C21 74.1(11) . . ?

O4 O13 C7 108(2) . . ?

O12 O14 C21 54.0(9) . . ?

 

_diffrn_measured_fraction_theta_max    0.955

_diffrn_reflns_theta_full              28.39

_diffrn_measured_fraction_theta_full   0.955

_refine_diff_density_max    1.049

_refine_diff_density_min   -1.105

_refine_diff_density_rms    0.087
